# Supplementary material
Source: PubMed Central journal article supplement (PMC4691555)
Supplement: NIHMS692265-supplement.pdf [file NIHMS692265-supplement.pdf]

**Table of contents**

**Covariate Definition Methods**

**A Note About the Data**

**Appendix Table A1. Characteristics of 66 restaurants included in the study**

**Appendix References**

## **Covariate Definitions Methods**

Several covariates were created to incorporate into the analyses. The following text describes these measures in detail.

### **Item Level Covariates**

**Children’s menu item.** The MenuStat data contained character variables with text describing menu item names and menu item descriptions. Any menu item or menu item description containing the words “kid”, “kids”, “child”, or “children” was classified to be a children’s menu item. This was a binary measure of whether or not an item was a children’s menu item.

**Chicken menu category.** A menu category was created to include only chicken items. Any menu item or menu item description containing the words “chicken”, “drumstick”, “breast”, “thigh”, or “nugget” was classified as being in the chicken menu category.

### **Restaurant Level Covariates**

**National restaurant chain.** For each restaurant, we used Google maps to code whether or not a restaurant had any location in each of the 9 U.S. Census Divisions.<sup>43</sup> To indicate a national restaurant chain, a binary measure of whether a restaurant chain had locations in all 9 Census Divisions or not as created. This binary measure was included in the analysis after careful consideration of continuous measures of Census divisions (i.e., 1-9) or dummy variables for whether or not a restaurant had a location in each of the 9 Census divisions.

**Restaurant type.** Each restaurant was coded as either full service, fast casual, or fast food. The first step was to look at restaurants' websites to determine if they self-identified as full-service, fast casual, or fast-food/quick-service. If so, the restaurant's self-identification was used. If not, full-service restaurants were defined as those with table service. Fast casual restaurants were defined as those that had at least two of the following four criteria: non-disposable utensils, onsite food preparation, no table service, and commitment to higher-quality or fresh ingredients or sustainability.<sup>44</sup> Fast food restaurants were defined as those with no table service and meeting fewer than two of the above criteria.

#### **A Note About the Data**

This manuscript presents results using MenuStat data collected in January 2012, 2013, and 2014. During the summer of 2014, the MenuStat project made several changes in order to expand and improve the dataset. As part of these changes (which we learned about through personal communication with the MenuStat team), some menu items that were not previously included for 2012 and 2013 restaurant menus were added into the data (representing less than 0.5% of the total sample). These changes resulted in a 53-item discrepancy between the raw data that we downloaded in March 2013 (which we analyzed and published in January 2015 in the *American Journal of Preventive Medicine*<sup>1</sup>) and the raw data that we downloaded in November 2014 and analyzed in the present manuscript. This item discrepancy does not meaningfully change our results for 2012 and 2013; however, the careful reader will note that the present manuscript does not exactly replicate 2012 and 2013 results from our previous work.

**Appendix**  
**Calorie Changes in Large Chain Restaurants: Declines in New Menu Items but Room for Improvement**  
**Bleich et al.**

**Appendix Table A1.** Characteristics of 66 Restaurants Included in the Study

| <b>Restaurant</b>          | <b>No. items<sup>a</sup></b> | <b>% items<sup>a</sup></b> | <b>No. Census divisions<sup>b</sup></b> |
|----------------------------|------------------------------|----------------------------|-----------------------------------------|
| <b><i>Fast Food</i></b>    | <b>12,754</b>                | <b>55.29</b>               | <b>7.5</b>                              |
| Arby's                     | 179                          | 0.8                        | 9                                       |
| Baskin Robbins             | 427                          | 1.9                        | 9                                       |
| Bojangles                  | 89                           | 0.4                        | 6                                       |
| Burger King                | 450                          | 2.0                        | 9                                       |
| Carl's Jr.                 | 294                          | 1.3                        | 3                                       |
| Checker's Drive-In/Rallys  | 146                          | 0.6                        | 6                                       |
| Chick-Fil-A                | 156                          | 0.7                        | 9                                       |
| Church's Chicken           | 85                           | 0.4                        | 8                                       |
| Culver's                   | 632                          | 2.7                        | 7                                       |
| Dairy Queen                | 818                          | 3.5                        | 9                                       |
| Del Taco                   | 151                          | 0.7                        | 6                                       |
| Dominos                    | 503                          | 2.2                        | 9                                       |
| Dunkin' Donuts             | 841                          | 3.6                        | 9                                       |
| Einstein Bros              | 263                          | 1.1                        | 9                                       |
| El Pollo Loco              | 225                          | 1.0                        | 3                                       |
| Five Guys                  | 50                           | 0.2                        | 9                                       |
| Hardee's                   | 235                          | 1.0                        | 7                                       |
| In-N-Out Burger            | 23                           | 0.1                        | 3                                       |
| Jack in the Box            | 387                          | 1.7                        | 7                                       |
| Jamba Juice                | 409                          | 1.8                        | 9                                       |
| KFC                        | 239                          | 1.0                        | 9                                       |
| Krystal                    | 162                          | 0.7                        | 2                                       |
| Little Caesars             | 31                           | 0.1                        | 9                                       |
| Long John Silver's         | 127                          | 0.6                        | 9                                       |
| McDonald's                 | 701                          | 3.0                        | 9                                       |
| Panda Express              | 142                          | 0.6                        | 9                                       |
| Papa John's                | 132                          | 0.6                        | 9                                       |
| Popeyes                    | 91                           | 0.4                        | 9                                       |
| Quiznos                    | 1,286                        | 5.6                        | 9                                       |
| Sonic                      | 1,068                        | 4.6                        | 9                                       |
| Steak 'N Shake             | 398                          | 1.7                        | 8                                       |
| Subway                     | 363                          | 1.6                        | 9                                       |
| Taco Bell                  | 214                          | 0.9                        | 9                                       |
| Tim Hortons                | 470                          | 2.0                        | 5                                       |
| Wendy's                    | 319                          | 1.4                        | 9                                       |
| Whataburger                | 281                          | 1.2                        | 4                                       |
| White Castle               | 446                          | 1.9                        | 4                                       |
| <b><i>Full Service</i></b> | <b>6,315</b>                 | <b>27.4</b>                | <b>8.3</b>                              |
| Applebee's                 | 366                          | 1.6                        | 9                                       |
| Bob Evans                  | 383                          | 1.7                        | 6                                       |
| California Pizza Kitchen   | 475                          | 2.1                        | 9                                       |
| Chili's                    | 262                          | 1.1                        | 9                                       |
| Denny's                    | 398                          | 1.7                        | 9                                       |

**Appendix**  
**Calorie Changes in Large Chain Restaurants: Declines in New Menu Items but Room for Improvement**  
 Bleich et al.

| <b>Restaurant</b>         | <b>No. items<sup>a</sup></b> | <b>% items<sup>a</sup></b> | <b>No. Census divisions<sup>b</sup></b> |
|---------------------------|------------------------------|----------------------------|-----------------------------------------|
| Friendly's                | 679                          | 2.9                        | 4                                       |
| Golden Corral             | 443                          | 1.9                        | 9                                       |
| IHOP                      | 710                          | 3.1                        | 9                                       |
| LongHorn Steakhouse       | 314                          | 1.4                        | 8                                       |
| O'Charley's               | 217                          | 0.9                        | 6                                       |
| Olive Garden              | 318                          | 1.4                        | 9                                       |
| Outback Steakhouse        | 246                          | 1.1                        | 9                                       |
| PF Chang's                | 295                          | 1.3                        | 9                                       |
| Pizza Hut                 | 245                          | 1.1                        | 9                                       |
| Red Lobster               | 505                          | 2.2                        | 8                                       |
| Romano's Macaroni Grill   | 202                          | 0.9                        | 9                                       |
| Ruby Tuesday              | 299                          | 1.3                        | 9                                       |
| TGI Friday's              | 163                          | 0.7                        | 9                                       |
| <b><i>Fast Casual</i></b> | <b>4,057</b>                 | <b>17.6</b>                | <b>7.6</b>                              |
| Boston Market             | 137                          | 0.6                        | 8                                       |
| Captain D's               | 189                          | 0.8                        | 6                                       |
| Chipotle                  | 59                           | 0.3                        | 9                                       |
| Ci Ci's Pizza             | 79                           | 0.3                        | 8                                       |
| Jason's Deli              | 487                          | 2.1                        | 7                                       |
| Jimmy John's              | 60                           | 0.3                        | 8                                       |
| Panera Bread              | 743                          | 3.2                        | 9                                       |
| Papa Murphy's             | 206                          | 0.9                        | 7                                       |
| Qdoba                     | 155                          | 0.7                        | 9                                       |
| Starbucks                 | 1,715                        | 7.4                        | 9                                       |
| Zaxby's                   | 227                          | 1.0                        | 4                                       |
| <b>TOTAL</b>              | <b>23,066</b>                | <b>100.0</b>               | <b>8.0</b>                              |

<sup>a</sup> Indicates the total number and percentage of items in the MenuStat data in 2012-2013.

<sup>b</sup> Indicates the total number of 9 U.S. Census Divisions in which a restaurant has locations.

Means are shown for numbers in bold.

<sup>c</sup> Focus refers to whether a restaurant has a primary type of menu item that is the specialty, based on content on each restaurant's website. Other focus indicates restaurants that do not specialize in burgers, pizza, or sandwiches.
